# Supplementary material for: Low friction and high load bearing capacity layers formed by cationic-block-non-ionic bottle-brush copolymers in aqueous media
Source: Royal Society of Chemistry journal article supplement (doi:10.1039/c3sm27862j), 2013-01-01
Supplement: c3sm27862j.pdf [file c3sm27862j.pdf]

## Low Friction and High Load Bearing Capacity Layers Formed by Cationic-*block*-Non-Ionic Bottle-Brush Copolymers in Aqueous Media

Xiaoyan Liu<sup>1\*</sup>, Esben Thormann<sup>1</sup>, Andra Dedinaite<sup>1,2</sup>, Mark Rutland<sup>1,2</sup>, Ceslav Visnevskij<sup>3</sup>, Ricardas Makuska<sup>3</sup>, and Per M. Claesson<sup>1,2</sup>

<sup>1</sup>KTH Royal Institute of Technology, School of Chemical Sciences and Engineering, Department of Chemistry, Surface and Corrosion Science, Drottning Kristinas väg 51, SE-100 44 Stockholm, Sweden

<sup>2</sup>SP Technical Research Institute of Sweden, Chemistry, Materials and Surfaces, P.O. Box 5607, SE-114 86 Stockholm, Sweden

<sup>3</sup>Department of Polymer Chemistry, Vilnius University, Naugarduko 24, LT-03225 Vilnius, Lithuania

\*Corresponding author at: Surface and Corrosion Science, KTH Royal Institute of Technology, Drottning Kristinas väg 51, SE-100 44 Stockholm, Sweden

E-mail: xiaoyanl@kth.se

### Supplementary information

Ten consecutive force curves measured between silica surfaces coated with (METAC)<sub>m</sub>-*b*-(PEO<sub>45</sub>MEMA)<sub>n</sub> across a 50 ppm aqueous solution of the block copolymer are shown in Figure S1. This gives a good indication of the reproducibility.

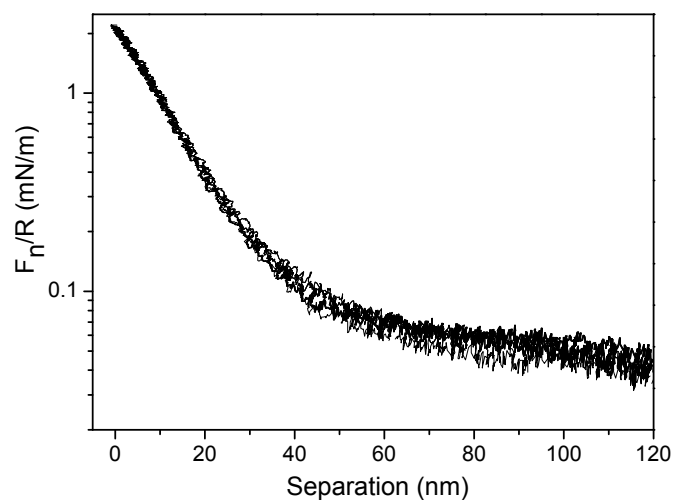

Figure S1. Ten consecutive force curves measured between silica surfaces coated with (METAC)<sub>m</sub>-*b*-(PEO<sub>45</sub>MEMA)<sub>n</sub> across a 50 ppm aqueous solution of the block copolymer. In the main paper one representative force curve is shown for clarity.
